# Supplementary material for: Comparison of total ozone measurements in Melbourne, Australia, performed with a low-cost micro spectrometer and a Brewer MK-III
Source: Copernicus journal article supplement (doi:10.5194/egusphere-2025-87), 2025-02-17
Supplement: Supplementary file [file egusphere-2025-87-AC2-supplement.pdf]

**We thank the reviewer for the very thorough, detailed and constructive review. The reviewer makes a number of very pertinent suggestions for improvements to both the instrument and the retrieval which we hope to investigate with future work and further development. Of course, the results reported here relate to a specific campaign carried out over a fixed time period which was not able to be extended.**

## **RC2**

### **General Comments:**

The paper by Edvardsen et al. presents a newly developed low-cost total ozone instrument, including technical descriptions, ozone retrieval algorithm, and some validation. The new instrument shows good potential to be a low-cost instrument performing network-level monitoring. However, the retrieval algorithm currently developed seems to be oversimplified and some extra validation work would be good to confirm its performance. In addition, the calibration of the new instrument relies on a collocated Brewer spectrophotometer. Is the calibration at a given site transferable to any other locations (where we might not have a Brewer)? Most likely it will not be straightforward, such as it would depend on the altitude of the site, local ozone and aerosol profiles, etc. Some discussion and explanation is needed.

Nevertheless, this work is a good match with AMT and within the scope of the journal. I recommend publishing this work after addressing the following issues.

**While the work reported here is based on the results of a specific comparison at one location, it should apply also at other mid-latitude sites.**

### **Specific Comments:**

Line 32: to make this claim more convincing, maybe give some rough numbers here for the listed instruments. At least, Pandora and BTS-solar instruments are commercially available.

**We would prefer not to state numbers because prices vary of course with time, delivery costs, currency conversions etc, but in broad terms an instruments such as the Pandora or BTS would cost at least 20-30% of the price of a Brewer. This instrument is more than an order of magnitude cheaper than that so we feel the statement is quite reasonable. As the reviewer intimates, Brewers are not currently available for purchase in any case.**

Line 55-56: In fact, there are still lots of good improvements on Brewer DS ozone. E.g., Savastiouk et al., 2023.

**Thanks, this has been added.**

Line 57-60: To justify the claim, some more quantitative description is needed. E.g., % of DS data removed due to cloud conditions.

**Thanks, this has been added.**

Line 60-64: some references for Brewer ZS method and data quality are needed.

**Reference to the Brewer ZS method is found at the end of section 3.1.**

Line 84-85: The cloud effect could affect DS, ZS, and even GI TOC. I understand the latter two should have better performance than DS in cloudy conditions. Some more quantitative description is needed to support such a claim.

**We have added additional quantitative description in section 3.1 Data assessment.**

Line 110: Why does Brewer DS have a cut off at 63 degrees ( $\mu$  value around 2.1)? Is this a single or double Brewer? For double, typically the cut off could be 75 degrees ( $\mu$  around 3.5).

**It is a double Brewer but at the time of the campaign, the schedule had been set to only take Umkehr measurements above 63°. The information is added to the manuscript.**

Line 116: is there an option to control the exposure time? It is a bit surprising that some data has to be discarded due to this.

**Yes, the exposure time can be set to a fixed value in the operating software up to a maximum of 10s. It was initially set too high at the beginning of the campaign which caused the detector to saturate for wavelengths > 310 nm, for SZA's less than ~40° - 45°. Once the problem had been identified a more optimal setting was used.**

Line 120-121: some observation SZA ranges could be provided for the reader to understand the capacity of STS. Can STS perform observations when SZA is close to 90 degrees (like ZSL-DOAS systems)?

**Figure 6 shows how the measurements are unreliable for SZA's > ~70°. From inspection of the raw data the dark level at 312.2 nm is ~80% of the total signal when the SZA reaches ~70° resulting in a very low dynamic range (see last paragraph of 3.1).**

Line 165: given this is a new effort, why use "Bass and Paur", not anything we know has better performance (e.g., SDY, see Redondas et al., 2014; Voglmeier et al., 2024)?

**Bass and Paur was chosen to match the cross-sections used by the Brewer algorithm.**

Line 155-156: The figure shows the method will lose sensitivity for SZA < 40 degrees. The good news is the method would have good sensitivity for TOC from 300-500 DU, when SZA is in the range of 40 to 80 degrees. This should be good enough for most mid-latitude conditions (but could be challenging for low- and high- latitude areas). I would expect to see a detailed exam on the algorithm detection limits or uncertainty budgets.

**We don't agree not that the method loses sensitivity for SZA < 40° as the detector is working in the higher level of the dynamic range (0-16384) and the UV-irradiance is much stronger compared to SZA's > 40°. Towards SZA of 70° the dynamic range is reduced 5-6 times compared to SZA's ~ 30° (see last paragraph of 3.1), and this is of course a problem. For all realistic TOC and SZA combinations for any latitude, the best results are always obtained**

for smaller SZA's. The problem of high latitude areas (SZA's > 40° / large air mass) is in general weaker UV-irradiance in combination with generally cloudier conditions and higher TOC values in these areas, further reducing the UV-irradiance.

Line 161-162: So, the LUT is only good for mid-latitude, correct?

**Yes, libRadtran offers the use of AFGL atmosphere profiles from tropical, mid-latitude, and sub-arctic areas. The LUT for this work was calculated using a mid-latitude profile. Further work could consider the sensitivity of the results to the details of the profile used to calculate the LUT.**

Line 172-175: I am a bit surprised that the author directly used the ratio between measured and modelled irradiance. Given that the spectrometer is not absolute calibrated, how can we ensure such ratio close to unity? Such ratio will be different for different instruments, correct?

**We have revised the text to try to make the explanation more complete and hopefully less confusing. The spectrometer was quasi calibrated towards a clear sky situation at 340 nm using a modelled  $GI_{340nm}$  as the reference**

Line 193-196: I am concerned about this issue. First, this 5% offset per 10 degrees C is not small. For some days in mid-latitude regions, a 10-degree C daily variation is common. The temperature for the warmest and coldest days is not given. But, if we use the 44.3 degrees C from the second warmest day (reported in the paper), the correction (or bias) is alarmingly 12%. Is this from wavelength drifting? For the algorithm, is there any "dynamic" wavelength registration or is it just using values from fixed pixels? Is this STS system placed outdoors without any temperature control? In any case, the author should show the correction factor's linear regression plot here (and also linear regressions of STS TOC vs. Brewer TOC, before and after applying this correction). Sophisticated correction is "cheaper", only if we cannot do it correctly. I agree with the author that some level of T control is needed for this system.

**This is a fair point. In the configuration used in the campaign, there was no way to know the temperature inside the STS, so the Brewer temperature sensor was used as a proxy. The analysis has used values from the same range of pixels for the two wavelengths regardless of temperature (that is, no dynamic wavelength registration). The instrument was left outdoors without any temperature control.**

**The temperature correction factor's linear regression and the linear regressions of STS TOC vs. Brewer, before and after applying this correction is shown in figure 2 in the manuscript.**

**We believe we have been transparent and accurately represented the performance and the limitations of the instrument as implemented in this campaign.**

Line 207-208: why STS has less data points than Brewer DS and ZS? Even including those four days of thunderstorm, STS still has fewer data points than others. Any idea? I would expect that this STS GI method should produce more data even in cloudy conditions, based on the claims in previous sections.

**In addition to the thunderstorm there were some other operational issues which reduced the number of measurements. One was the saturation problem caused by a too-high setting of the integration time which wasn't immediately noticed. Water collecting on the diffuser after rainfall also effected some days.**

Line 238-251: it is a bit strange to show a trend for such a small dataset, which even could not cover a full season cycle. But, it is a bit surprising that Brewer DS and ZS ratio has a significant trend. If this trend is real and keeps increasing, some ZS calibration might be needed (i.e., the nine coefficients should be recalculated). When was the last DS and ZS calibration done for this Brewer? Could the author include scatter plots for such a comparison? Also, I agree with the author that the poor performance of STS in the first 30 days could be due to inaccurate T correction. I am wondering if the author calculated the T correction parameters based on daily mean data or high-resolution observations. Any estimation on the uncertainty from this correction?

**Yes, the trend is statistically significant, but the effect is in only in the order of + 0.9 DU per month on average during the campaign. Since the ZS coefficients can be recalculated, the ZS results probably can be improved. However, the authors think that a scatter plot comparison to the ZS is a bit off the scope of this work as the STS measurements are mainly compared to the standard Brewer DS measurements.**

**Not only could the poor performance the first 30 days be due to inaccurate T correction, but also to the fact of the detector saturation for SZA < ~45 degrees. On average, 4 hours of data around solar noon during January is disregarded.**

**The temperature correction was applied to the high resolution data before further calculations were made. To put a number on the uncertainty from the temperature correction is really challenging as it is impossible to know the accurate STS temperature at any time. However, the difference in the standard deviation of the residuals between the uncorrected and corrected daily mean (Fig 2, panel b and c) at least gives an estimate on the uncertainty. Last DS calibration was May 22, 2018 and the ZS coefficients were recalculated March 21, 2019. The information is provided in the manuscript, line 99 – 100.**

Line 261-267: Not just cloud but also aerosol and surface albedo could affect the results. Cloud optical depth, aerosol optical depth, cloud layer heights, aerosol layer heights, surface albedo, and ozone profiles could all affect the ratio. This simple ratio method reminds me of “color-index” commonly used in the DOAS community, which is also just a simple ratio of two wavelengths (e.g., Wagner et al., 2016; Zhao et al., 2019). By any means, to convince the reader that all the suggested factors won't show a big impact, some detailed modelling work should be done (even better to understand the uncertainty).

**Modelling work on aerosol optical depth, albedo, and ozone profile shows less impact on the results. The modeling results are added at the end of section 3.2.**

Line 275-276: A typical timeserver nowadays can assure more than enough accuracy than  $\pm 20$  s. The major issue for this method and instrument came from other places. This is why I would suggest some level of uncertainty in budget estimation.

**The instrument was not allowed network access at the site (security issues), so time had to be adjusted manually around every two weeks to assure less than a 20 s drift. Maximum SZA change during any day is less than 0.2 deg/min. With an error of 0.1 deg @ SZA = 60 deg, the error is only 0.7 DU @ TOC = 280 DU. The error estimate is added to the manuscript.**

Line 279-281: based on the information provided, this is not a simple electrical noise, but something systematic. My first guess would be the wavelength registration issue. Is there any compensation for wavelength drifting? The resolution of the selected spectrometer is pretty low (3 nm), but do we see any slit function changes?

**We agree that there appears to be some systematic effect here which is probably related to wavelength shift. Our investigations were not able to characterise the drift in any way though which produced better results than the simple linear correction based on the proxy (Brewer) temperature.**

Line 287-289: Simple solutions such as white painting, shading covers, and better ventilation could be done to reduce direct heating from the sun. In any case, if the system could only survive up to 40 degrees C, it could not be used in many places. Also, is the simple linear correction for T only valid within 40 °C? Note that in Line 199, it claims that the system could work from 0 to 50 °C. Please provide consistent information.

**Yes, these are all very useful suggestions which definitely would have reduced the risk of overheating when outdoors temperature exceeded 40 °C. For a subsequent campaign we would definitely pay more attention to both temperature regulation and temperature characterisation.**

**The claim in line 199 is not for the system overall, but just for the spectrometer itself as it is not specified for operation in environments above 50 °C. Consistent information is provided in the revised manuscript.**

Line 310-312: some quantitative description is needed. It is a bit hard to understand to what extent STS consider the condition as “too cloudy”.

**“Too cloudy” is replaced with a more quantitative explanation in the revised manuscript.**

Line 313-314: give this is a very simple instrument, such stability for six months is good but not enough. Lots of total ozone monitoring instruments need to be as stable as 2 years with minimal maintenance supports (such as entrance cleaning). Also, it would be important to see if there is any seasonal bias between STS and Brewer. Is this STS no longer co-located with Brewer?

**Yes, this is all very true, but the campaign was limited by circumstances and not able to be extended. In the future we hope to repeat the comparison for a longer period of time but with some refinements.**

Last, in fact, Brewer also can retrieve total ozone via UV irradiance, not just DS and ZS. Some solid works were done almost 30 years ago. I would suggest the author check (Fioletov et al., 1997). For example, I would suggest using the log scale for the ratio and using all wavelengths instead of just one (312 nm).

**Thanks, we have added the reference and noted this in the text.**

**We found through lab testing that other wavelengths in this range (305-323 nm) suffered from non-linear response and concluded that the only pair giving reasonable results was the 312/322 nm pair. This might have been a characteristic of the individual spectrometer though.**

**Technical Comments:**

Line 26: left parenthesis is missing

**OK**

Line 82-84: need to rewrite this sentence to make it clearer

**OK**

Line 89: reference is missing

**OK**

**Line 91: definitions for WOUDC, NDACC, and PGN are needed.**

**OK**

Line 93: change "Environment & Climate Change, Canada" to "Environment and Climate Change Canada".

**OK**

Line 102: delete the repeated "in a"

**OK**

Line 112: change "clods" to "clouds"

**OK**

Figure 2: what are "SZ" measurements? Please use consistent naming for the data. Also, the legend shows DS, ZS, and STS, while the caption talked about "ZS and GI measurements".

**OK**

## Reference

- Fioletov, V. E., Kerr, J. B., and Wardle, D. I.: The relationship between total ozone and spectral UV irradiance from Brewer observations and its use for derivation of total ozone from UV measurements, *Geophys. Res. Lett.*, 24, 2997–3000, <https://doi.org/10.1029/97GL53153>, 1997.
- Redondas, A., Evans, R., Stuebi, R., Köhler, U., and Weber, M.: Evaluation of the use of five laboratory-determined ozone absorption cross sections in Brewer and Dobson retrieval algorithms, *Atmos. Chem. Phys.*, 14, 1635–1648, <https://doi.org/10.5194/acp-14-1635-2014>, 2014.
- Savastiouk, V., Diémoz, H., and McElroy, C. T.: A physically based correction for stray light in Brewer spectrophotometer data analysis, *Atmospheric Measurement Techniques*, 16, 4785–4806, <https://doi.org/10.5194/amt-16-4785-2023>, 2023.
- Voglmeier, K., Velazco, V. A., Egli, L., Gröbner, J., Redondas, A., and Steinbrecht, W.: The transition to new ozone absorption cross sections for Dobson and Brewer total ozone measurements, *Atmospheric Measurement Techniques*, 17, 2277–2294, <https://doi.org/10.5194/amt-17-2277-2024>, 2024.
- Wagner, T., Beirle, S., Remmers, J., Shaiganfar, R., and Wang, Y.: Absolute calibration of the colour index and O<sub>4</sub> absorption derived from Multi AXis (MAX-)DOAS measurements and their application to a standardised cloud classification algorithm, *Atmos. Meas. Tech.*, 9, 4803–4823, <https://doi.org/10.5194/amt-9-4803-2016>, 2016.
- Zhao, X., Bognar, K., Fioletov, V., Pazmino, A., Goutail, F., Millán, L., Manney, G., Adams, C., and Strong, K.: Assessing the impact of clouds on ground-based UV–visible total column ozone measurements in the high Arctic, *Atmos. Meas. Tech.*, 12, 2463–2483, <https://doi.org/10.5194/amt-12-2463-2019>, 2019.
